# Supplementary material for: Coexistence with Pseudomonas aeruginosa alters Staphylococcus aureus transcriptome, antibiotic resistance and internalization into epithelial cells
Source: PubMed Central journal article supplement (PMC6851120; doi:10.1038/s41598-019-52975-z), 2019-11-12
Supplement: 41598_2019_52975_MOESM1_ESM.pdf [file 41598_2019_52975_MOESM1_ESM.pdf]

**Coexistence with *Pseudomonas aeruginosa* alters *Staphylococcus aureus* transcriptome, antibiotic resistance and internalization into epithelial cells**

Paul Briaud, Laura Camus, Sylvère Bastien, Anne Doléans-Jordheim, François Vandenesch and Karen Moreau.

**Supplementary data**

## Supplementary data

**Table S1:** Laboratory *S. aureus* strains, other species strains and plasmids used in this study.

| Strains and Plasmids  |                    | Genotypes                              | References |
|-----------------------|--------------------|----------------------------------------|------------|
| <i>S. aureus</i>      | LUG3040            | RN6390 WT                              | 2          |
|                       | LUG2955            | RN6390 $\Delta tet38$                  | This study |
|                       | LUG26              | Newman WT                              | 3          |
|                       | LUG1790            | Newman <i>RNAlII::tetM</i>             | 4          |
|                       | LUG30              | Newman <i>agr::tetM</i>                | 5          |
|                       | LUG3135            | Newman <i>mgrA::tetM</i>               | 6          |
|                       | LUG2262            | Lac WT                                 | 7          |
|                       | LUG3134            | Lac $\Delta mgrA$                      | 6          |
|                       | LUG2995            | SF8300 WT                              | 8          |
|                       | LUG2987            | SF8300 $\Delta agrA$                   | 8          |
| <i>B. cepacia</i>     | LUG2886            | CF clinical strains                    | This study |
| <i>S. maltophilia</i> | LUG2884            | CF clinical strains                    | This study |
| Plasmids              | pMAD               | pMAD vector                            | 1          |
|                       | pMAD- <i>tet38</i> | pMAD for <i>tet38</i> allelic exchange | This study |

1. Arnaud, M., Chastanet, A. & Debarbouille, M. New Vector for Efficient Allelic Replacement in Naturally Nontransformable, Low-GC-Content, Gram-Positive Bacteria. *Appl. Environ. Microbiol.* **70**, 6887–6891 (2004).
2. Novick, R. P. *et al.* Synthesis of staphylococcal virulence factors is controlled by a regulatory RNA molecule. *EMBO J.* **12**, 3967 (1993).
3. Duthie, E. S. & Lorenz, L. L. Staphylococcal coagulase; mode of action and antigenicity. *J. Gen. Microbiol.* **6**, 95–107 (1952).
4. Supersac, G., Piémont, Y., Kubina, M., Prévost, G. & Foster, T. J. Assessment of the role of gamma-toxin in experimental endophthalmitis using *ahlg*-deficient mutant of *Staphylococcus aureus*. *Microb. Pathog.* **24**, 241–251 (1998).
5. Wolz, C., McDevitt, D., Foster, T. J. & Cheung, A. L. Influence of *agr* on fibrinogen binding in *Staphylococcus aureus* Newman. *Infect. Immun.* **64**, 3142–3147 (1996).
6. Crosby, H. A. *et al.* The *Staphylococcus aureus* Global Regulator MgrA Modulates Clumping and Virulence by Controlling Surface Protein Expression. *PLoS Pathog.* **12**, (2016).
7. Voyich, J. M. *et al.* Is Panton-Valentine Leukocidin the Major Virulence Determinant in Community-Associated Methicillin-Resistant *Staphylococcus aureus* Disease? *J. Infect. Dis.* **194**, 1761–1770 (2006).
8. Rasigade, J.-P. *et al.* PSMs of Hypervirulent *Staphylococcus aureus* Act as Intracellular Toxins That Kill Infected Osteoblasts. *PLoS ONE* **8**, (2013).

**Table S2: List of primers used in this study**

| Primers | Direction | Sequences (5'-3')        | Target                  | Size (bp) |
|---------|-----------|--------------------------|-------------------------|-----------|
| OLUG4-F | Forward   | AGCGAGTGAAAACACGCAAC     | <i>sbi</i>              | 152       |
| OLUG4-R | Reverse   | TTCTTGTGCACGTTCTGGGT     |                         |           |
| OPB1bF  | Forward   | CAAACCTGCCGTTTAGCTGC     | <i>norb_3</i>           | 103       |
| OPB1bR  | Reverse   | TGCTCGTACTTAAGCCAAGGT    |                         |           |
| OPB2F   | Forward   | ACAATTTGGCACACCAACAGA    | <i>potA</i>             | 100       |
| OPB2R   | Reverse   | TCTAACCATGCGTCCTTCAACA   |                         |           |
| OPB5F   | Forward   | ACGCAAGAAGAACTTGCTGAAC   | <i>potR</i>             | 124       |
| OPB5R   | Reverse   | GCGTCGTTCTAACACCTCT      |                         |           |
| OPB19bF | Reverse   | CAACACGTTGCCATTGTTGC     | <i>nrdE</i>             | 149       |
| OPB19bR | Forward   | GACTAGCTCACCACGACG       |                         |           |
| OPB24F  | Reverse   | TCCGCCAGCTAAGTTCCAAG     | <i>sirA</i>             | 142       |
| OPB24R  | Forward   | TCCAAATGCGAAAGATGCTGC    |                         |           |
| OPB31F  | Reverse   | AACGTTGGATGCGTATGGGT     | <i>deoD</i>             | 88        |
| OPB31R  | Forward   | AATGCTTCGACACCAGCGTA     |                         |           |
| OPB32F  | Reverse   | AGCTGAAGCGACTTTGTCAGATGC | <i>mgrA</i>             | 110       |
| OPB32R  | Forward   | AGCGTGAACGTTCCGAAGTCGA   |                         |           |
| SarZ-F1 | Forward   | GATTCTGGAACACTGACACCAT   | <i>sarZ</i>             | 138       |
| SarZ-R1 | Reverse   | AGCAAGAGGGCTTTTTATTGCT   |                         |           |
| OPB35F  | Forward   | CAATTGGAACGCACGAGTCAA    | <i>tetR21</i>           | 176       |
| OPB35R  | Reverse   | GGGCTGTTTGTCCATTACCCA    |                         |           |
| OLUG1-F | Forward   | GGTGGCGACTTTGATCTAGC     | <i>gyrB</i>             | 169       |
| OLUG1-R | Reverse   | TTATAACAACGGTGGCTGTGC    |                         |           |
| OLUG2-F | Forward   | TTACGTGCAGCACGTTAC       | <i>hU</i>               | 125       |
| OLUG2-R | Reverse   | AAAAAGAAGCTGGTTCAGCAGTAG |                         |           |
| Pr1-F   | Forward   | TGCGTCACG                | <i>tet38 upstream</i>   | 981       |
| Pr1-R   | Reverse   | CCCGGGAGCCGAATTCAAT      |                         |           |
| Pr2-F   | Forward   | CATCTACACCAATGACAGTGC    | <i>tet38 downstream</i> | 1000      |
| Pr2-R   | Reverse   | CTCCCGGTACCATGGATAGAT    |                         |           |
| OPB40F  | Forward   | ATAAATTCGCGAGAT          | <i>norA</i>             | 178       |
| OPB40R  | Reverse   | TAACTAGACAGATCTCTCAAT    |                         |           |
| OPB41F  | Forward   | TTAGTATAGTATGCTTCTG      | <i>norB</i>             | 78        |
| OPB41R  | Reverse   | TATCGCCGTTTGGTGGTACG     |                         |           |
| OPB42bF | Forward   | GTCACACCCGGCATTACCAT     | <i>norC</i>             | 87        |
| OPB42bR | Reverse   | TGGTCAATTGGCTCATGGGG     |                         |           |
| OPB21bF | Forward   | ACGCCAACCTAAAAGTGTTGC    | <i>sstA</i>             | 114       |
|         |           | AGTTGGCGTTGCTTCAGGTA     |                         |           |
|         |           | CCGGCATATACTGCACCACT     |                         |           |
|         |           | CTGGAACGATGGAATGGGCT     |                         |           |

|         |         |                              |              |     |
|---------|---------|------------------------------|--------------|-----|
| OPB21bR | Reverse | ACGTACCGCAAATACTGCAA         |              |     |
| OPB48F  | Forward | GGGCATTAGATGCGACAGCA         | <i>sak</i>   | 70  |
| OPB48R  | Reverse | ACTTCGATCTTTGCGCTTGG         |              |     |
| OP45F   | Forward | ATGGCCAGAGTTACGAGTGT         | <i>nrdF</i>  | 93  |
| OP45R   | Reverse | CGTCATTTTCCCTTGACCAGC        |              |     |
| OPB49F  | Forward | CCACTGCACTCGCACGATTA         | <i>scn_3</i> | 70  |
| OPB49R  | Reverse | TTGCTAGTTTTATCATTGGGAGCA     |              |     |
| HlaF    | Forward | GGTAATGTTACTGGTGATGATACAGGAA | <i>hla</i>   | 72  |
| HlaR    | Reverse | TGCAAATGTTTCGATTGGTCATACAC   |              |     |
| saeR-F1 | Forward | TGACCCACTTACTGATCGTGG        | <i>saeR</i>  | 154 |
| saeR-R1 | Reverse | ACCGCTAGTTGTCGTTGTTACT       |              |     |
| OBP46F  | Forward | GGGCTAAGTCTATTAGGTGGCG       | <i>nrdD</i>  | 78  |
| OPB46R  | Reverse | ACGTGCTCGAAATGCTTTGAC        |              |     |
| OPB52F  | Forward | TCACCAGCAGCATTAGCGAT         | <i>aur</i>   | 93  |
| OPB52R  | Reverse | TGCTTTGACCGCATCACTCT         |              |     |



**Table S3: MIC of the 12 couples of strains**

| Strains | MIC ( $\mu\text{g/ml}$ ) |               |
|---------|--------------------------|---------------|
|         | Tetracycline             | Ciprofloxacin |
| SA27    | 0,7                      | 8             |
| SA30    | 11,25                    | 1             |
| SA31    | 0,5                      | 8             |
| SA42    | 1                        | 1             |
| SA69    | 0,5                      | 4             |
| SA80    | 8                        | 2             |
| SA82    | 0,5                      | 2             |
| SA146   | 0,5                      | 4             |
| SA152   | 1                        | 16            |
| SA153   | 1                        | 8             |
| SA156   | 4                        | 2             |
| SA2599  | 4                        | 4             |
| PA27    | 8                        | 2             |
| PA30    | 8                        | 1,5           |
| PA31    | 12                       | 0,5           |
| PA42    | 4                        | 0,047         |
| PA69    | 1,5                      | 1,5           |
| PA80    | 4                        | 0,38          |
| PA82    | 8                        | 8             |
| PA146   | 24                       | 0,38          |
| PA152   | 16                       | 1             |
| PA153   | 12                       | 2             |
| PA156   | 8                        | 0,19          |
| PA2600  | 16                       | 6             |

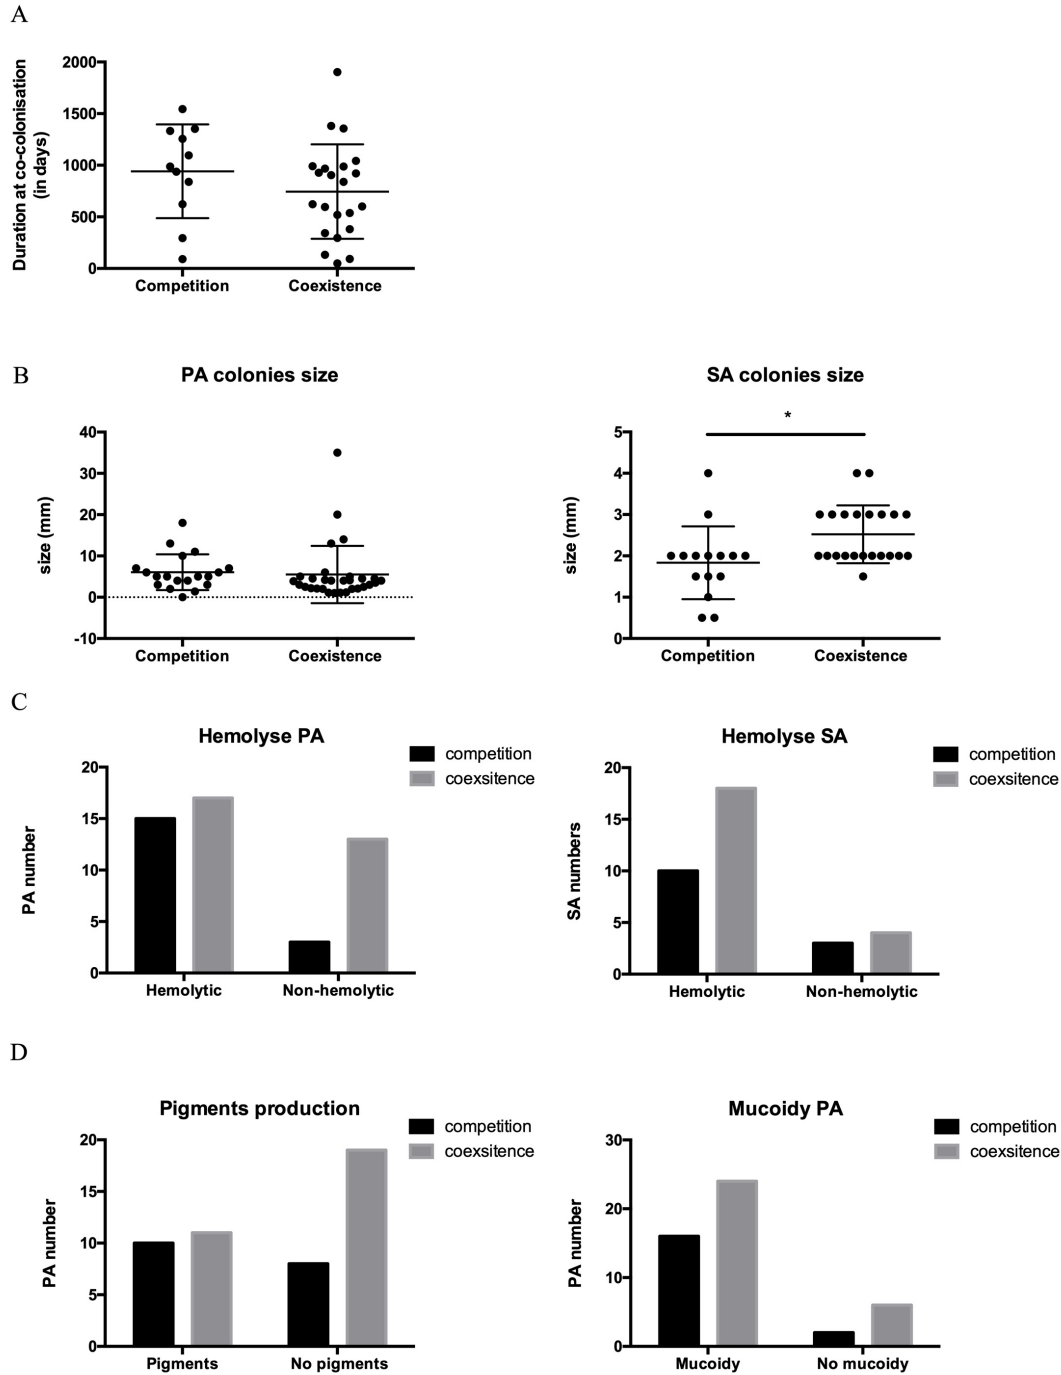

**Figure S1:** Statistical analysis of phenotypic differences between coexisting and competitive strains. No significant differences were observed for the duration of co-colonization (**A** – T-test, p value =0,2532), *P. aeruginosa* colonies size (**B**- T test, p-value for PA =0,7489 and for SA=0,0119), hemolytic properties (**C** – Fisher test, p-value for PA =0,0,0683 and for SA>0,999), *P. aeruginosa*

pigment production and mucoid phenotype (**D**- Fisher test, p-value for pigment =0,2402 and for mucoidy =0,6918). A significant difference was observed for *S. aureus* colony sizes.

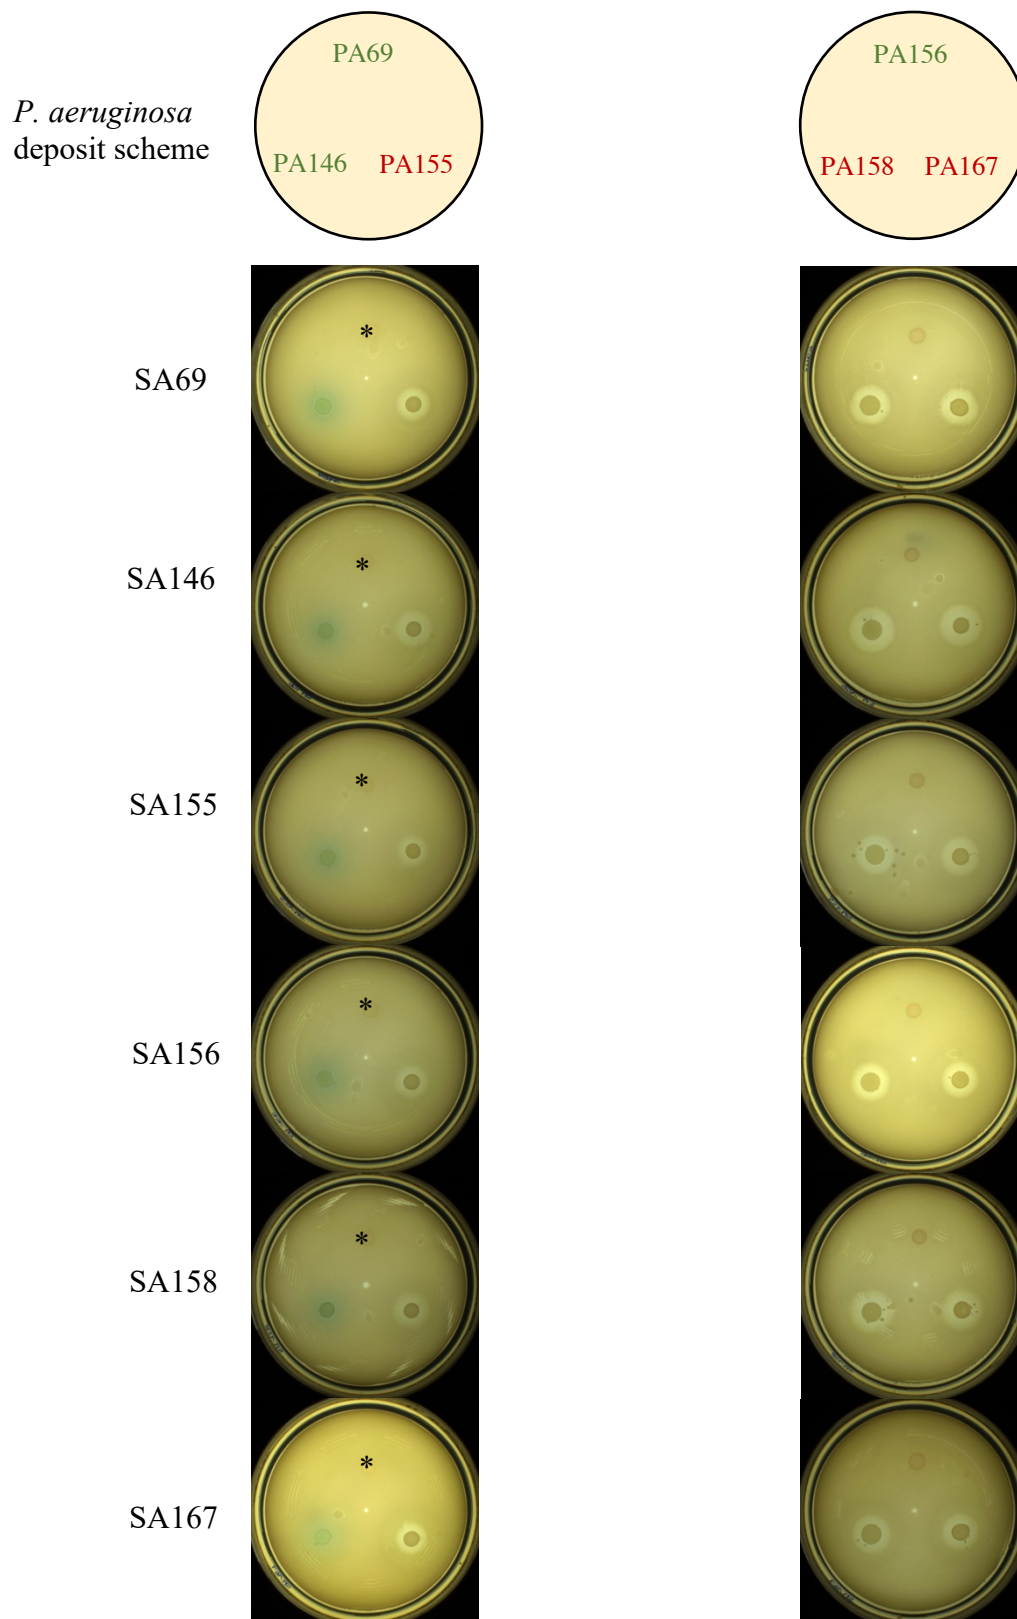

**Figure S2:** Crossed agar competition assay. *S. aureus* - *P. aeruginosa* strain pairs 69, 146, 155, 156, 158 and 167 were cultivated over-night in BHI at 37°C. *S. aureus* strains were plated at  $OD_{600nm}=0.5$  onto TSA as indicated on the left of the photograph and left to dry for 15min. *P. aeruginosa* spots were deposited as depicted in the top scheme. *P. aeruginosa* green tags represent a coexisting isolate (absence of inhibition halo) whereas red tags represent a competition isolate (presence of inhibition halo). \* symbols indicate the PA69 spots, which are faintly visible on the pictures.

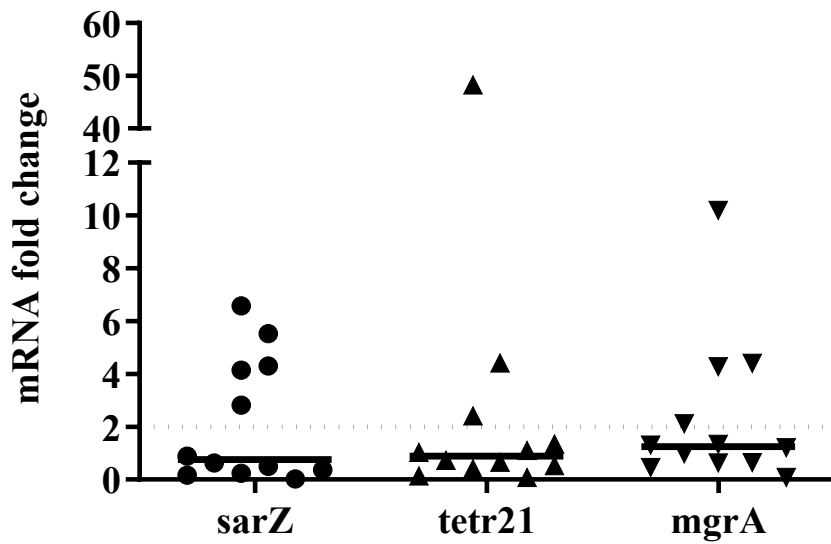

**Figure S3:** Coculture with *P. aeruginosa* has no effect on *tet38* major regulators. RNAs were extracted from a mono- and coculture at 4 hours and gene expression was monitored by RT-qPCR. The results represent the median gene expression obtained from twelve coexisting strain pairs. The dotted line depicts fold change= 2.

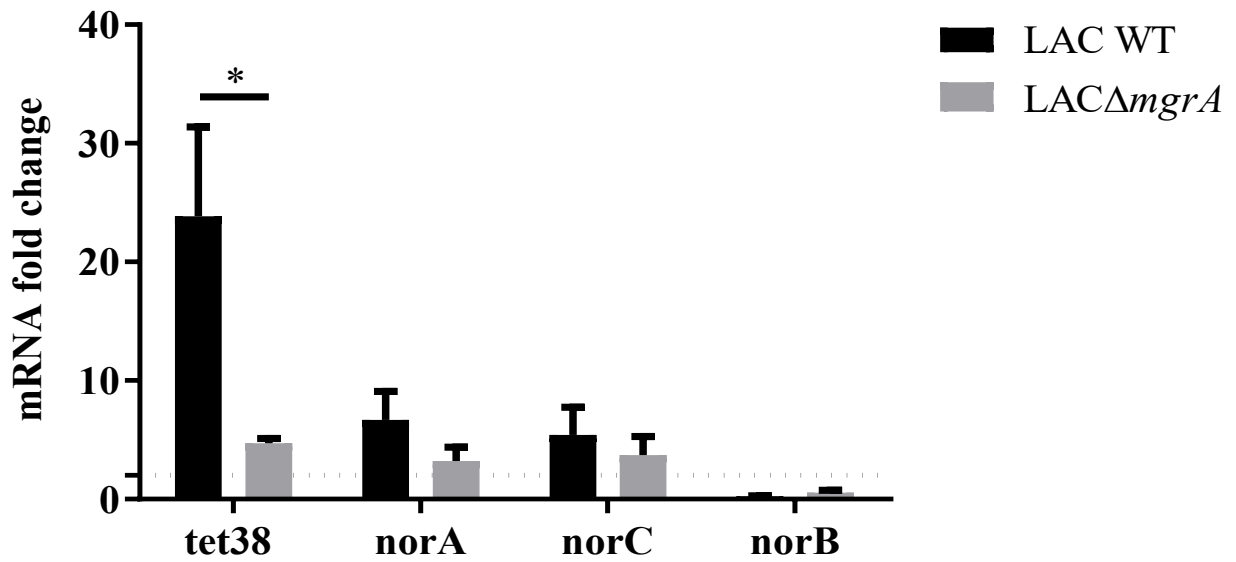

**Figure S4:** MgrA is important for *nor* genes over-expression. Cocultures with *S. aureus* LAC wild type (WT) and *mgrA* mutants ( $\Delta mgrA$ ) and PA30 were performed. RNAs were extracted at 8 hours and *nor* gene expression monitored by RT-qPCR. The dotted line indicates a fold change= 2. The results are shown as the mean + standard deviation of three independent experiments. Statistical analysis was performed by unpaired t-test (\*  $P < 0.05$ )

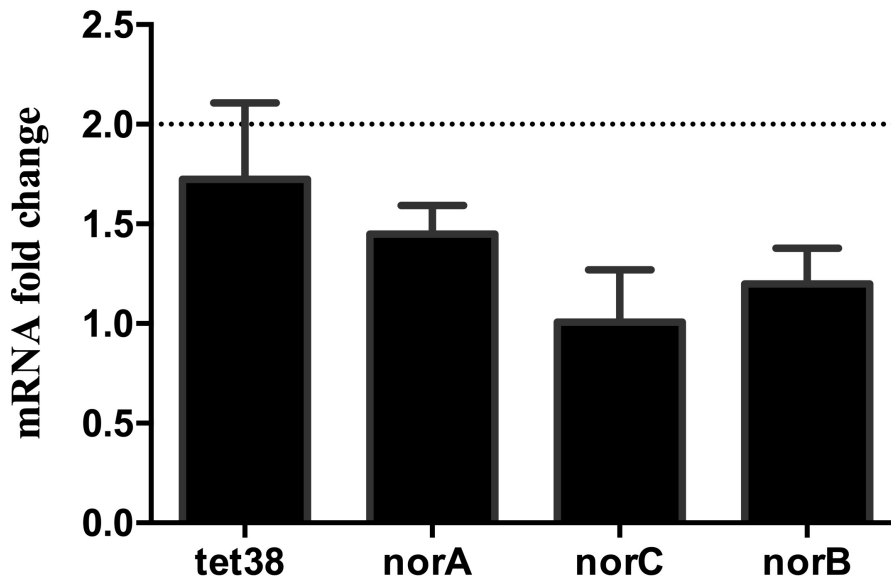

**Figure S5:** *S. aureus* *nor* genes over-expression requires close contact with *P. aeruginosa*. *S. aureus* was exposed to an 8 hours supernatant culture of *P. aeruginosa*. RNAs were extracted and *nor* gene expression was monitored by RT-qPCR. Dotted lines represent fold change= 2. The results are shown as the mean + standard deviation of three independent experiments on SA30-PA30 pairs. Statistical analysis was performed by unpaired t-test (\* P<0.05, \*\* P<0.01).

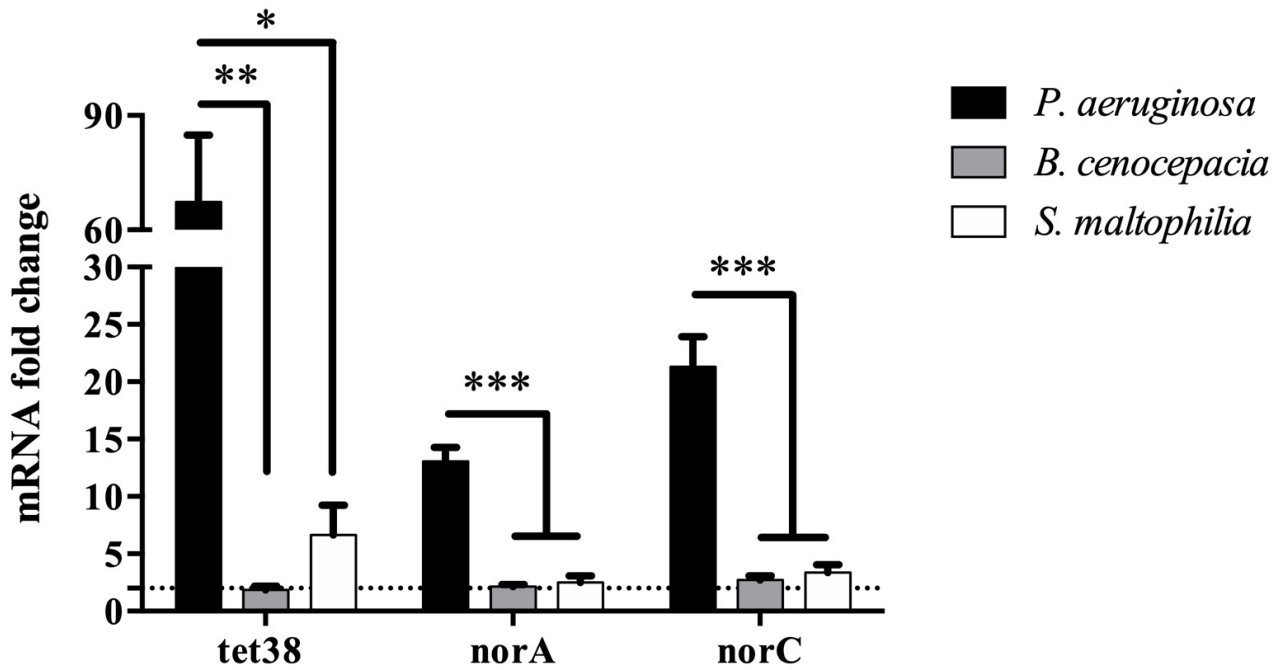

**Figure S6:** Specificity of *nor* genes family over-expression induced by *P. aeruginosa*. *S. aureus* was mono- and co-cultivated as described earlier. RNAs were extracted at 8 hours and gene expression was monitored by RT-qPCR. The dotted line indicates a fold change= 2. The results represent the mean + standard deviation of three independent experiments conducted with pair SA146-PA146. Statistical analysis was performed by One-way Anova with the Dunnett correction multiple test (\*  $P < 0,05$ , \*\*  $P < 0,01$ , \*\*\*  $P < 0,001$ ).



A

|                      | Pair 27                                                                              | Pair 31                                                                            | Pair 69                                                                             |
|----------------------|--------------------------------------------------------------------------------------|------------------------------------------------------------------------------------|-------------------------------------------------------------------------------------|
| Mono-infection (SA)  | 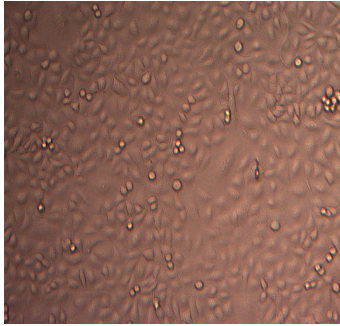    |  |  |
| Co-infection (SA+PA) |     |  |  |
| Non-Infected         |  |                                                                                    |                                                                                     |

B

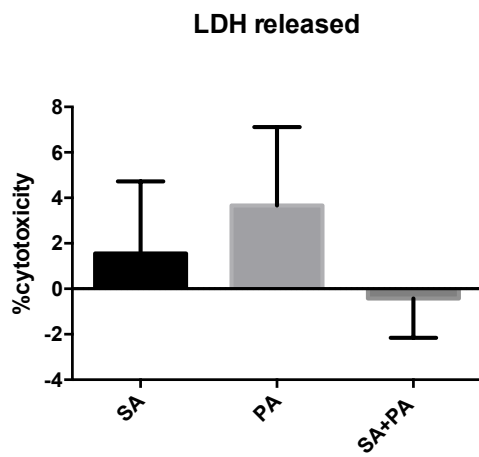

**Figure S7:** Co-infection with *S. aureus* and *P. aeruginosa* do not impact cell shape and viability. A549 cells were infected at a multiplicity of infection (MOI) of 10:1 for mono-culture and 20:1 for coculture. After 2 hours of infection and 1 hour of antibiotic treatment to eliminate extracellular bacteria, cells were photographed (**A**) and LDH was measured in the supernatant using CytoTox-ONE™ Homogeneous Membrane Integrity Assay (Promega) (**B**) following the manufacturer's instructions.
